# Supplementary material
Source: PubMed Central journal article supplement (PMC3880125)
Supplement: NIHMS495217-supplement-1_si_001.pdf [file NIHMS495217-supplement-1_si_001.pdf]

## **SUPPORTING INFORMATION FOR:**

### **High Titer Heterologous Production of Lyngbyatoxin in *E. coli*, a Protein Kinase C Activator from an Uncultured Marine Cyanobacterium**

Sarah E. Ongley<sup>†</sup>, Xiaoying Bian<sup>‡</sup>, Youming Zhang<sup>§</sup>, Rocky Chau<sup>†</sup>, William H. Gerwick<sup>||</sup>, Rolf Müller<sup>‡\*</sup>, Brett A. Neilan<sup>†\*</sup>

<sup>†</sup> School of Biotechnology and Biomolecular Sciences, The University of New South Wales, Sydney 2052, Australia.

<sup>‡</sup> Department of Microbial Natural Products, Helmholtz Institute for Pharmaceutical Research Saarland, Helmholtz Centre for Infection Research and Department of Pharmaceutical Biotechnology, Saarland University, Saarbrücken 66041, Germany.

<sup>§</sup> Shandong University-Helmholtz Joint Institute of Biotechnology, State Key Laboratory of Microbial Technology, Shandong University, Shanda Nanlu 27, 250100 Jinan, P. R. China.

<sup>||</sup> Center for Marine Biotechnology and Biomedicine, Scripps Institution of Oceanography, and Skaggs School of Pharmacy and Pharmaceutical Science, University of California San Diego, La Jolla 92093, USA.

**Supplementary Table 1:**  $^1\text{H}$  (300 MHz) NMR data for ILV, **2**

| No. | $\delta_{\text{H}}$ (multiplicity, J=Hz) |                           |
|-----|------------------------------------------|---------------------------|
|     | conformer A <sup>†</sup>                 | conformer B <sup>†</sup>  |
| 2   | 7.11 (s)                                 | 6.94 (s)                  |
| 5   | 6.95 (dd, 7.4, 0.8)                      | 6.44 (dd, 7.4, 0.8)       |
| 6   | 7.06 (t, 7.7, 7.7)                       | 6.95 (t, 7.8, 7.8)        |
| 7   | 7.28 (dd, 8.0, 1.2)                      | 6.88 (dd, 8.2, 1.0)       |
| 8   | 2.88 (dd, 14.3, 1.6)                     | 3.04 (dd, 14.3, 1.6)      |
|     | 3.03 (dd, 14.3, 1.6)                     | 3.09 (m)                  |
| 9   | 4.24 (m)                                 | 2.24 (m)                  |
| 12  | 3.09 (m)                                 | 4.49 (d, 10.2)            |
| 14  | 3.22 (dd, 11.2, 6.9)                     | 3.46 (dd, 11.2, 9.1)      |
|     | not observed*                            | 3.62 (dd, 11.2, 4.6)      |
| 15  | 2.31 (dquin, 11.0, 6.6x4)                | 2.55 (dquin, 10.2, 6.6x4) |
| 16  | 0.9 (d, 6.5)                             | 0.61 (d, 6.7)             |
| 17  | 1.25 (d, 6.7)                            | 0.89 (d, 6.4)             |
| 18  | 2.71 (s)                                 | 2.89 (s)                  |

\*Signal was obscured by the solvent peak.

<sup>†</sup>Two conformational states are observed for ILV.

NMR spectra were obtained using the Bruker Avance III 300 system in MeOH- $d_4$  (CD<sub>3</sub>OD), and the solvent peak was used as an internal standard ( $\delta_{\text{H}}$  3.31).

**Supplementary Table 2:**  $^1\text{H}$  (600 MHz) NMR data for LTX, **1**

| No. | $\delta_{\text{H}}$ (multiplicity, J=Hz)                  |
|-----|-----------------------------------------------------------|
| 1   | not observed                                              |
| 2   | 6.91 (s)                                                  |
| 5   | 6.47 (d, 8.0)                                             |
| 6   | 6.93 (d, 8.0)                                             |
| 8   | 3.10 (dd, 17.4, 2.3)<br>2.05 (dd, 17.4, 3.7)              |
| 9   | 4.29 (s)                                                  |
| 10  | not observed                                              |
| 12  | 4.42 (d, 10)                                              |
| 14  | 3.65 (dd, 11.0, 4.7)<br>3.6 (dd, 11.0, 4.7)               |
| 15  | 2.54 (m)                                                  |
| 16  | 0.88 (d)                                                  |
| 17  | 0.63 (d)                                                  |
| 18  | 2.84 (s)                                                  |
| 20  | 1.46s)                                                    |
| 21  | 6.13 (ddd, 17.6, 10.7, 4.8)                               |
| 22  | 5.13 (dd, 10.7)<br>5.07 (dd, 17.6)                        |
| 23  | 1.81 (td, 13.2, 13.2, 4.9)<br>1.74 (ddd, 13.2, 11.8, 4.9) |
| 24  | 2.02 (br m)<br>1.61 (m*)                                  |
| 25  | 5.01 (br m)                                               |
| 27  | 1.47 (s)                                                  |
| 28  | 1.58 (br s)                                               |

\*Signal was obscured by an adjacent peak.

NMR spectra were obtained using the Bruker Avance III 600 system in  $\text{MeOH-}d_4$  ( $\text{CD}_3\text{OD}$ ), and the solvent peak was used as an internal standard ( $\delta_{\text{H}}$  3.31).

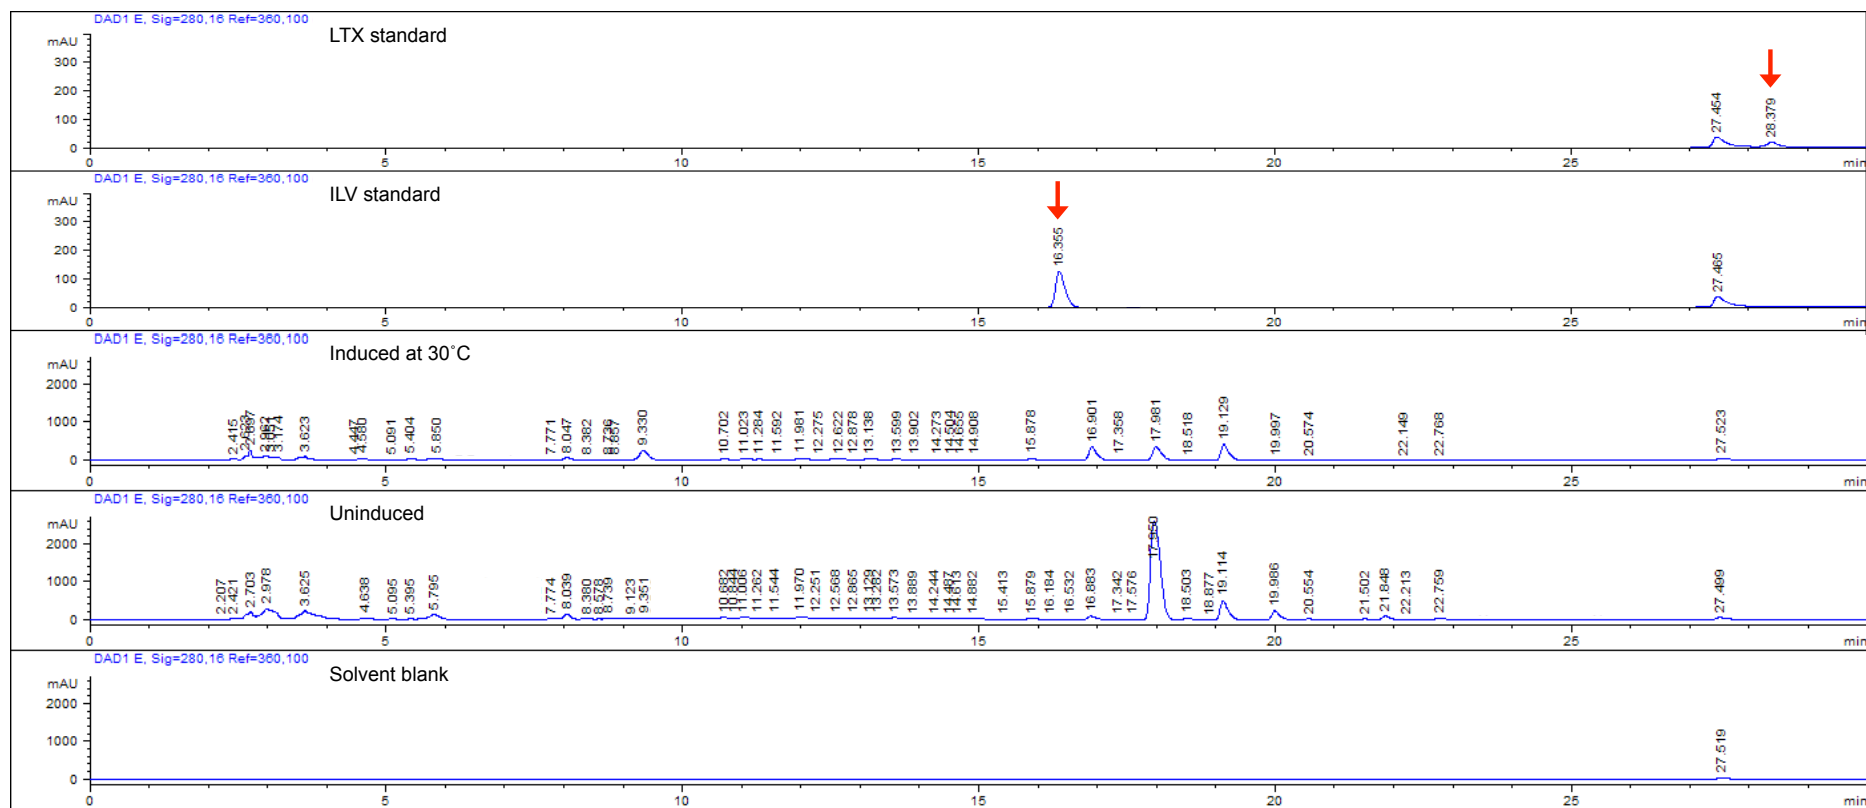

**Supplementary Figure 1.** HPLC analysis of crude *E. coli* extracts grown at 30°C. Solvent gradient 5-95% acetonitrile over 30 min. No production was observed at 30°C. Ten micrograms each of LTX and ILV standards (indicated with red arrows) were injected.

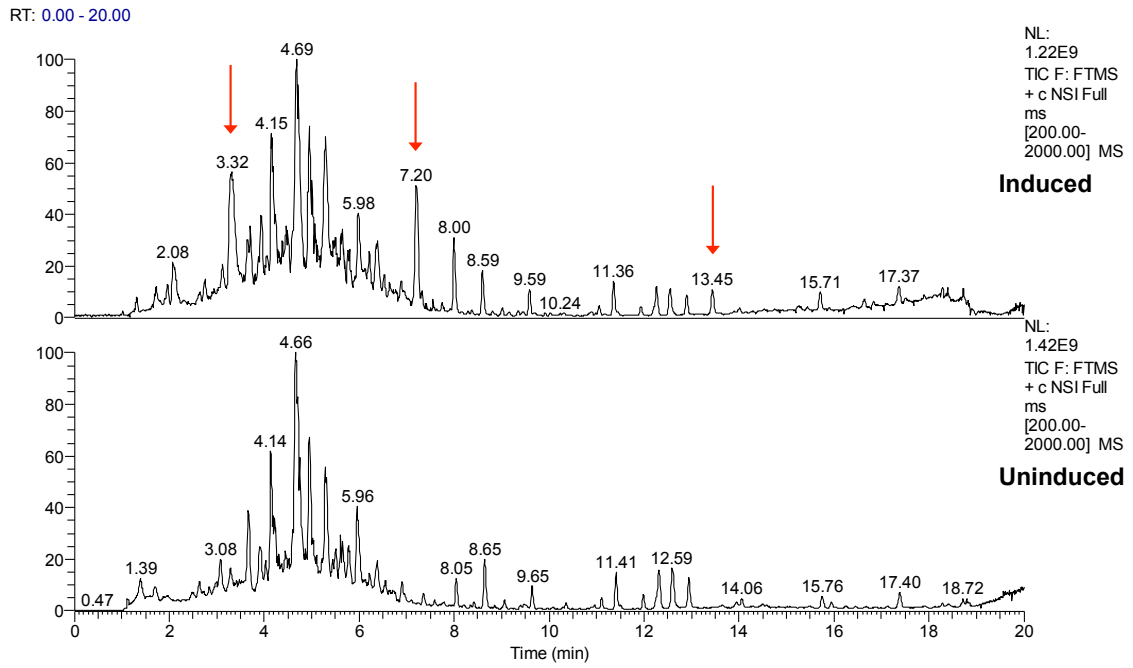

**Supplementary Figure 2.** LC-MS total ion count chromatogram of tetracycline-induced *E. coli* pCC-Ptet-ltx fermentation crude methanol extracts. Clear differences between the induced and uninduced cultures are indicated with red arrows.

Sarah\_4 #322-423 RT: 3.00-4.00 AV: 102 NL: 5.76E7

F: FTMS + c NSI Full ms[200.00-2000.00]

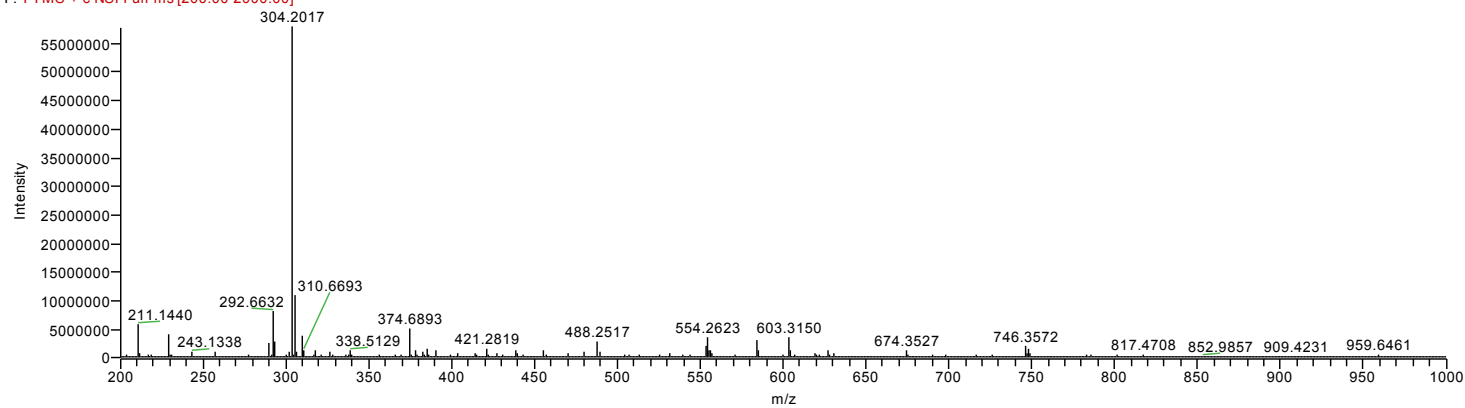

Sarah\_4 #3-2456 RT: 0.03-20.97 AV: 617 NL: 5.97E3

T: Average spectrum MS2 304.20 (3-2456)

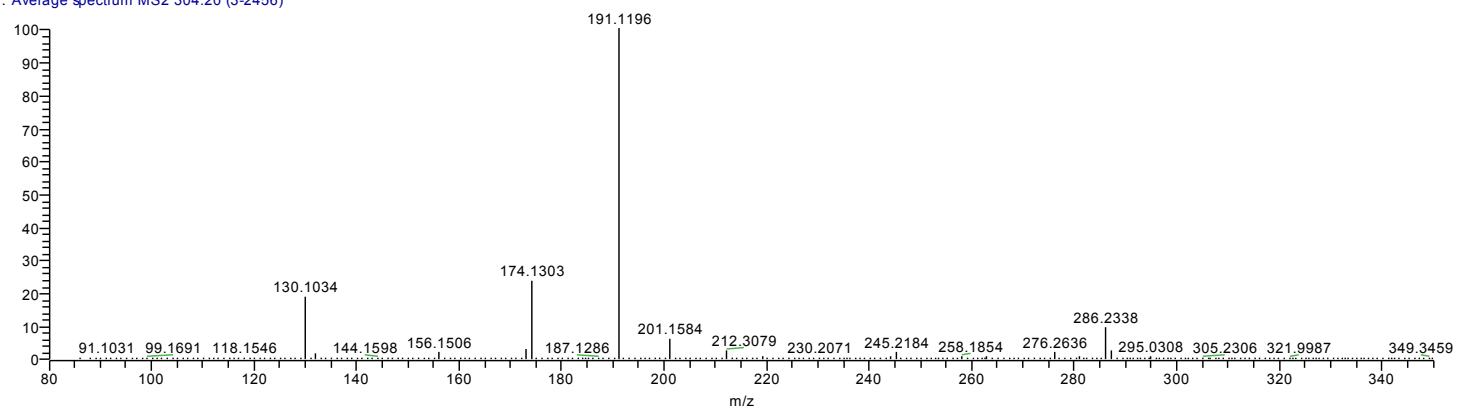

**Supplementary Figure 3a.** LC-MS/MS of tetracycline-induced *E. coli* pCC-Ptet-ltx fermentation crude methanol extract. Upper window, full spectra (0-1000 m/z) at retention time 3-4 min; Lower window, secondary ionization of  $304.2 \pm 0.5$  m/z.

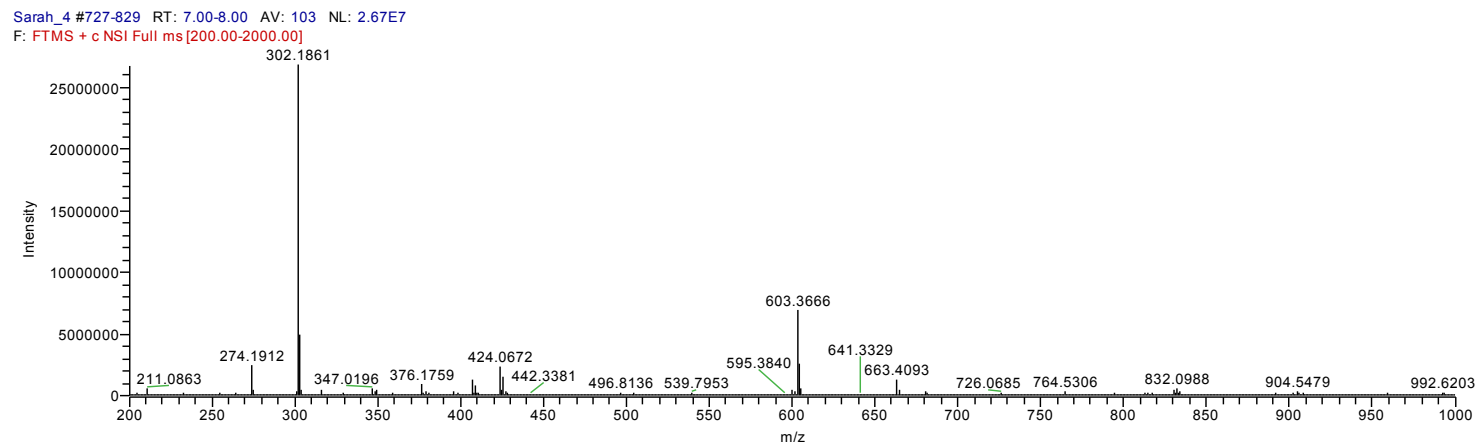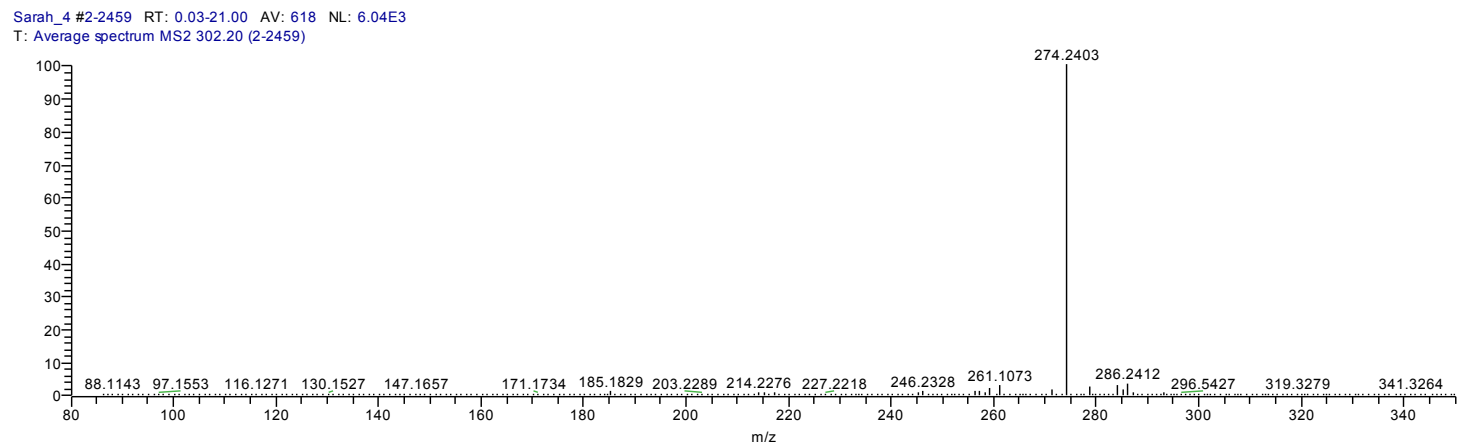

**Supplementary Figure 3b.** LC-MS/MS of tetracycline-induced *E. coli* pCC-Ptet-ltx fermentation crude methanol extract. Upper window, full spectra (0-1000 m/z) at retention time 7-8 min; Lower window, secondary ionization of  $302.2 \pm 0.5$  m/z.

Sarah\_4 #1389-1504 RT: 13.00-14.00 AV: 116 NL: 4.17E6  
F: FTMS + c NSI Full ms [200.00-2000.00]

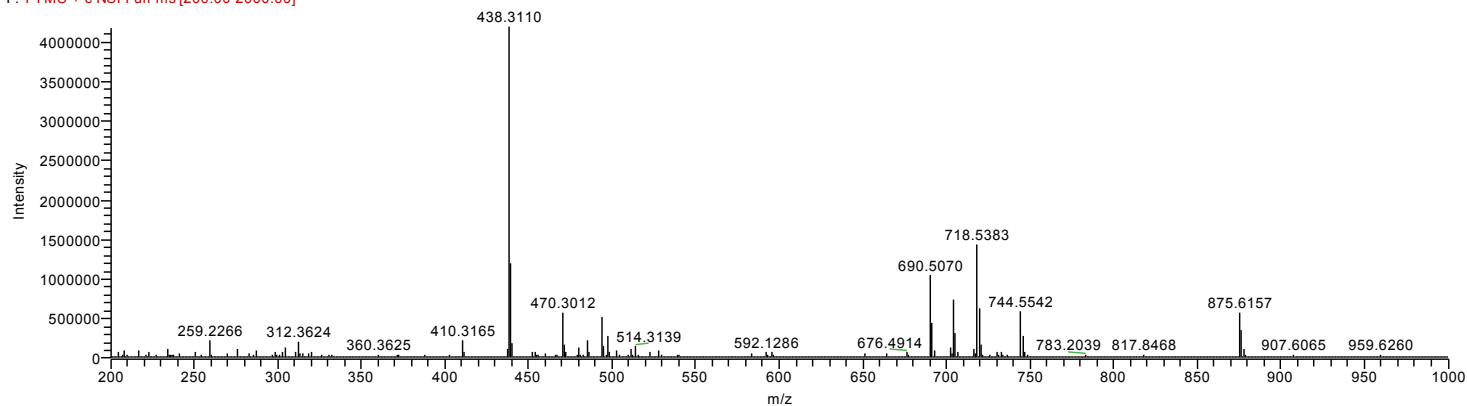

Sarah\_4 #4-2457 RT: 0.04-20.97 AV: 606 NL: 2.74E3  
T: Average spectrum MS2 438.31 (4-2457)

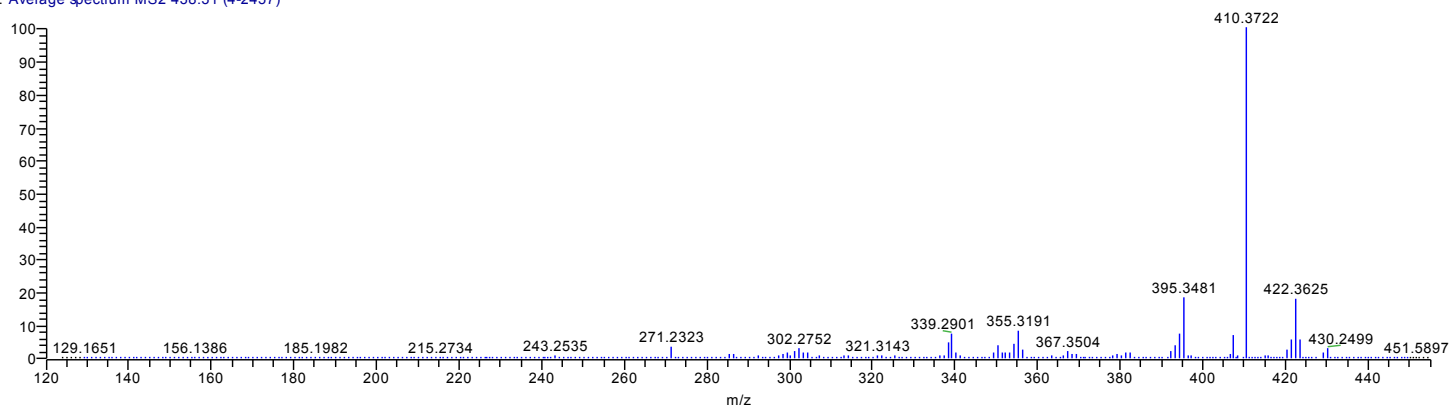

**Supplementary Figure 3c.** LC-MS/MS of tetracycline-induced *E. coli* pCC-Ptet-ltx fermentation crude methanol extract. Upper window, full spectra (0-1000 m/z) at retention time 13-14 min; Lower window, secondary ionization of  $438.31 \pm 0.5$  m/z.



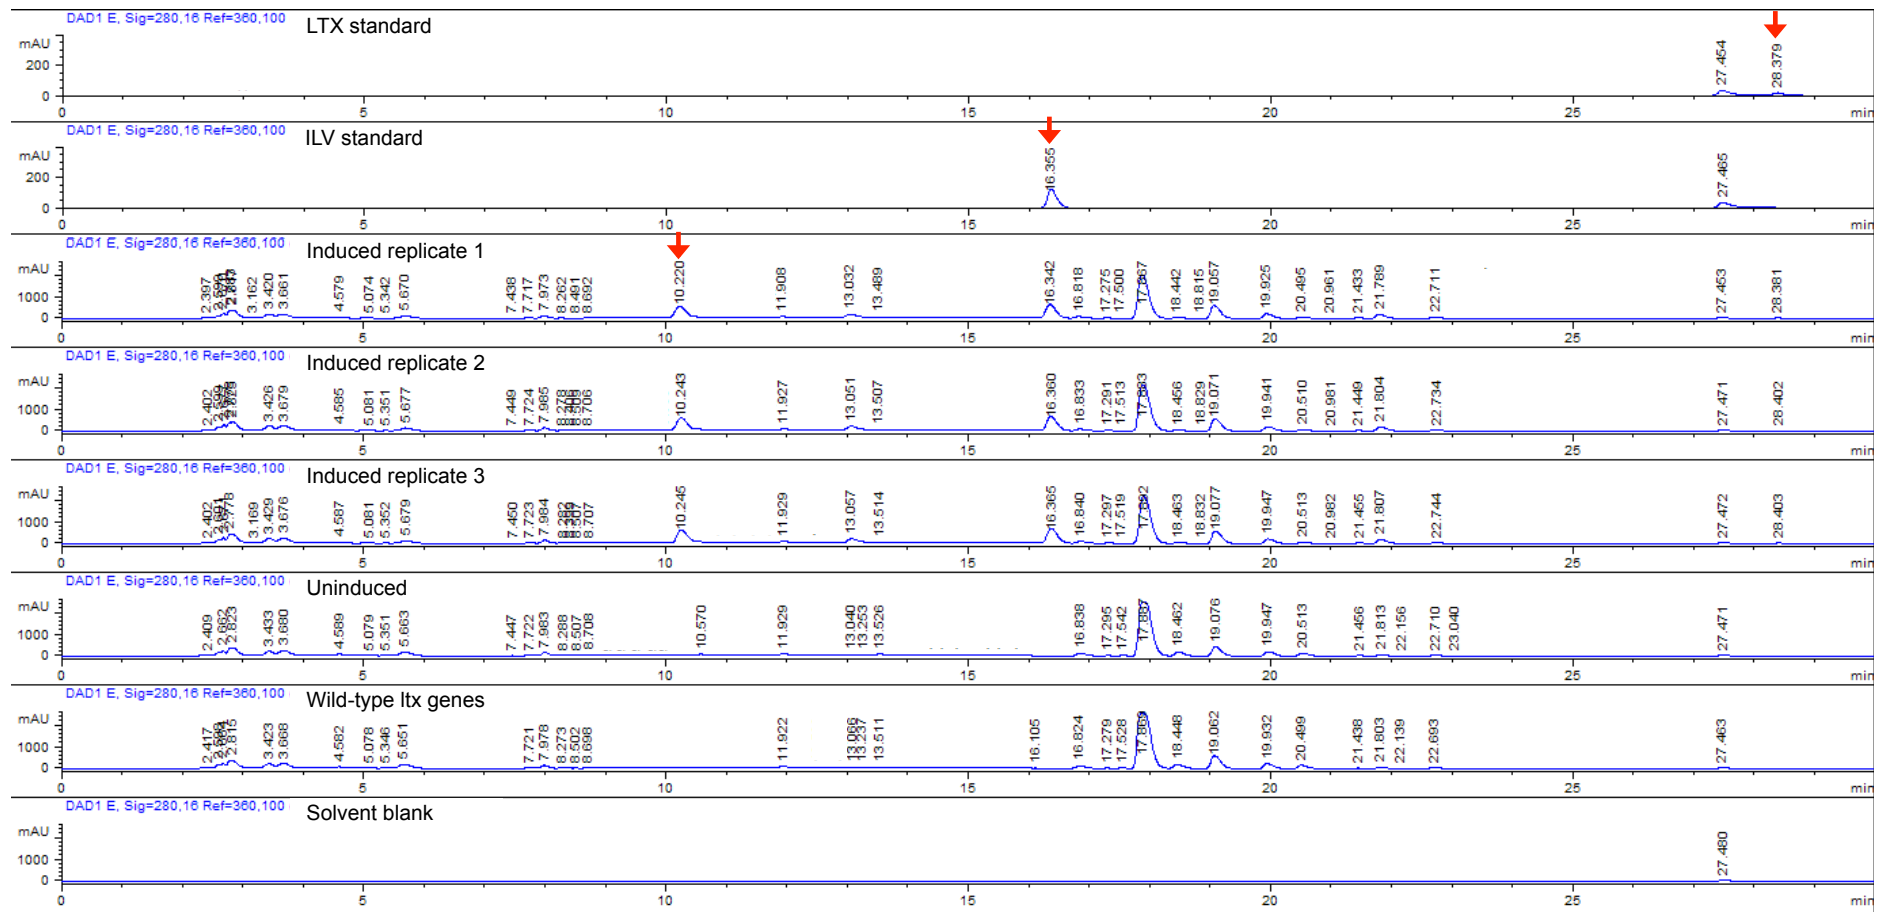

**Supplementary Figure 4.** HPLC analysis of crude *E. coli* extracts of tetracycline induced pCC-Ptet-ltx (3 replicates), uninduced pCC-Ptet-ltx and wild-type ltx gene cluster cultures cultivated at 18°C. Solvent gradient 5-95% acetonitrile over 30 min. Ten micrograms each of LTX and ILV standards (indicated with red arrows) and 2% of the crude extracts were injected. The peak corresponding to NVMT is indicated with a red arrow in the induced samples.

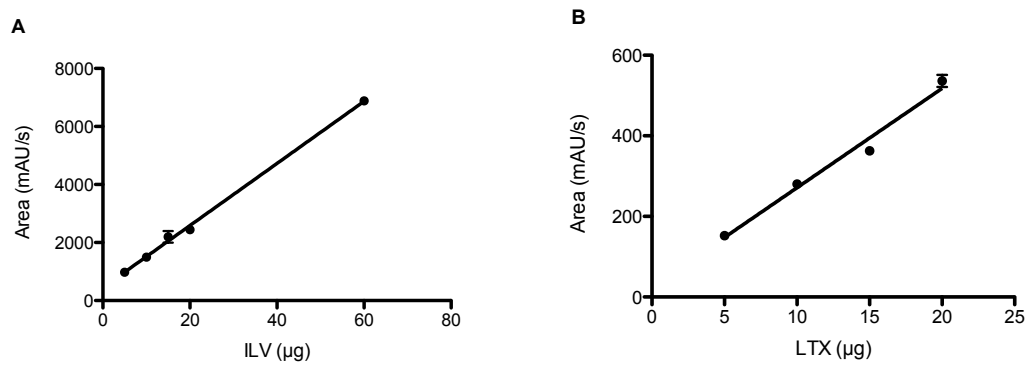

**Supplementary Figure 5.** Standard curves for quantification of (A) ILV ( $R^2 = 0.998$ ) and (B) LTX ( $R^2 = 0.981$ ) by HPLC. Each data point represents the average of at least two experiments.

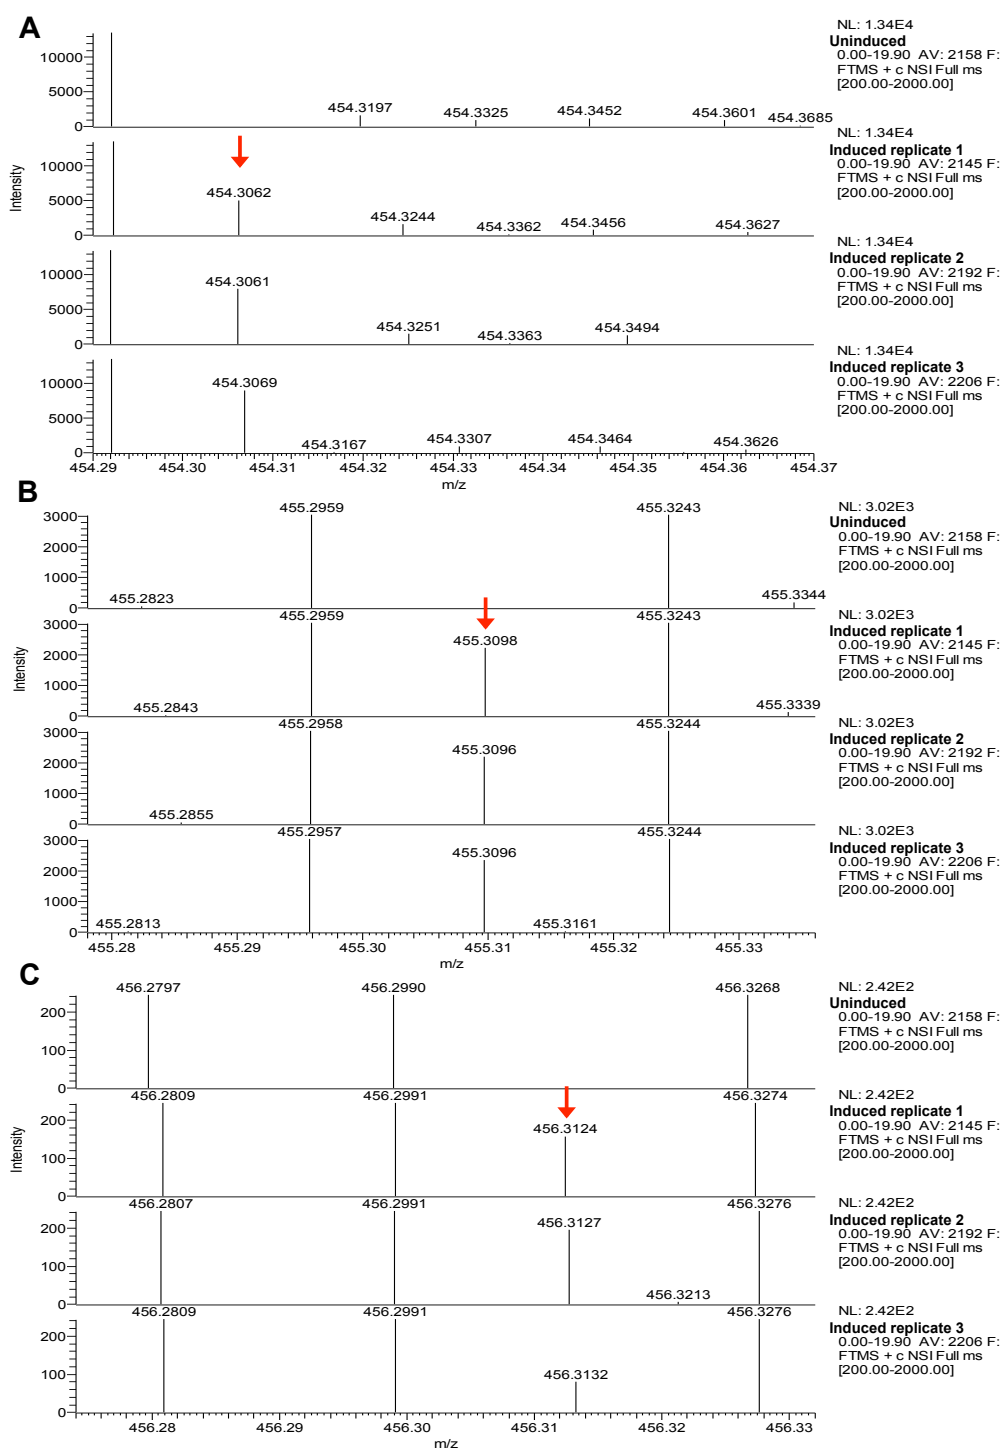

**Supplementary Figure 6.** Zoomed HR-ESI-MS spectra showing presence of ions indicative of the presence of lyngbyatoxin B or C isoforms. The experimental lyngbyatoxin B/C molecular ion isotope distribution for peaks corresponding to the expected is shown, (A) 454.31 [M+H]<sup>+</sup>, (B) 455.31 [M+H]<sup>+</sup>, (C) 456.31 [M+H]<sup>+</sup>. In all instances the top pane is uninduced, followed by triplicate induced cultures.

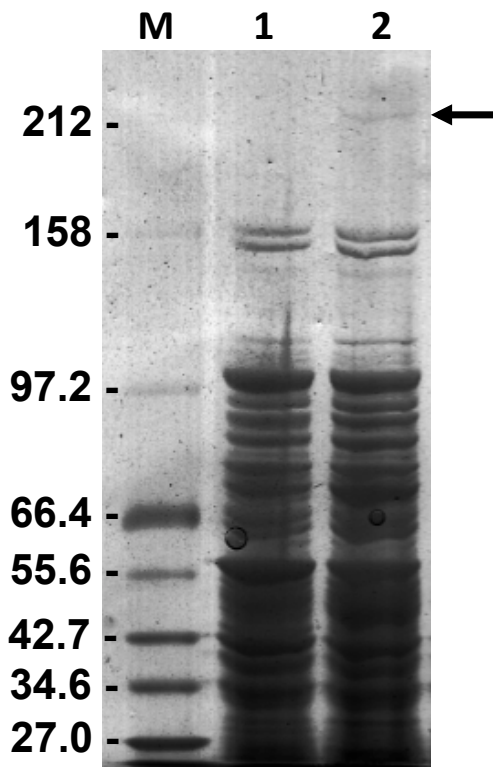

**Supplementary Figure 7.** SDS-PAGE of *E. coli* soluble protein fractions. M, broad range protein marker (2-212 kDa) (New England Biolabs); 1, uninduced GB05-MtaA pCC-Ptet-ltx; 2, tetracycline-induced GB05-MtaA pCC-Ptet-ltx on an Invitrogen NuPAGE Novex 3-8% Tris-Acetate 1.0 mm gel. Arrows indicate the band corresponding to LtxA. Protein identity was confirmed by LC-MS/MS analysis of the excised and tryptic digested protein band, with assignment as LtxA by MASCOT using the NCBI nr protein database.

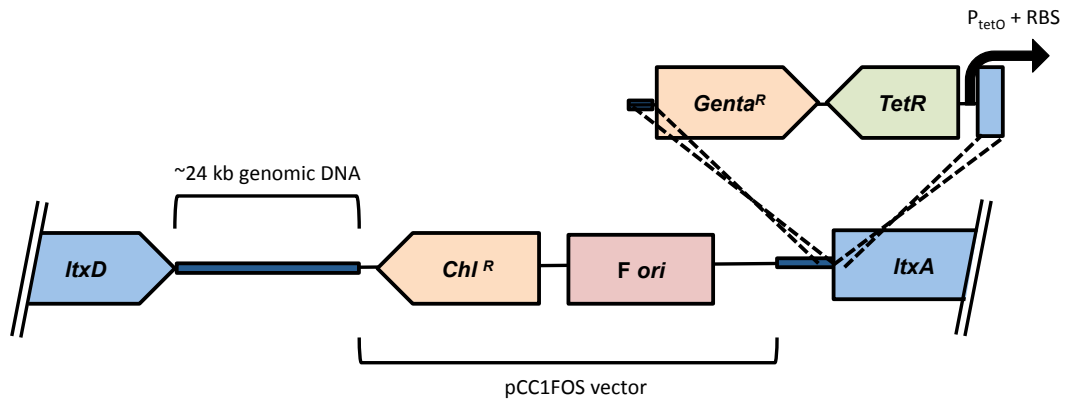

**Supplementary Figure 8.** Strategy for insertion of the tetracycline-inducible promoter ( $P_{tetO}$ ) cassette  $Genta^R$ -*TetR*- $P_{tetO}$ , consisting of gentamicin resistance (*aacCI*), tetracycline repressor (*tetR*) and  $P_{tetO}$  by recombineering using 40 nt homology arms to upstream of *ltxA* and to *ltxA* coding sequence (including the start codon).
